# Supplementary material
Source: MDPI journal article supplement (https://www.mdpi.com/2076-3298/10/4/68)
Supplement: s1 [file s1]

## SUPPLEMENTARY MATERIAL

Table S1: The statistical performance of 50 models was evaluated using 4 indicators: Pearson's correlation coefficient (r), mean bias (MB; in  $\mu\text{g m}^{-3}$ ), normalised mean bias (NMB), and normalised root-mean-square error (NRMSE);

|                        | Training set |      |      |       | Test set |      |      |       |
|------------------------|--------------|------|------|-------|----------|------|------|-------|
|                        | R2           | Mb   | NMB  | NRMSE | R2       | Mb   | NMB  | NRMSE |
| RF model               | 0.34         | 0.01 | 0.00 | 0.79  | 0.36     | 0.10 | 0.02 | 0.76  |
| 95 Confidence Interval | 0.01         | 0.00 | 0.00 | 0.01  | 0.02     | 0.06 | 0.01 | 0.03  |

Table S2. Variable importance for the chronological and meteorological variables.

|                        | date_unix | day_julian | weekday | air_temp | rh   | ws   | Pressure | visibility |
|------------------------|-----------|------------|---------|----------|------|------|----------|------------|
| Variable importance    | 11.60     | 4.26       | 3.21    | 5.13     | 3.95 | 2.53 | 3.85     | 1.85       |
| 95 Confidence Interval | 0.18      | 0.13       | 0.09    | 0.25     | 0.17 | 0.09 | 0.11     | 0.20       |
